# Supplementary material for: An explainable artificial intelligence approach for decoding the enhancer histone modifications code and identification of novel enhancers in Drosophila
Source: PubMed Central journal article supplement (PMC8574042; doi:10.1186/s13059-021-02532-7), 2021-11-08
Supplement: 13059_2021_2532_MOESM1_ESM.pdf [file 13059_2021_2532_MOESM1_ESM.pdf]

## **Additional file 1 - Supplementary Information**

### **An explainable artificial intelligence approach for decoding the enhancer histone modifications code and identification of novel enhancers in *Drosophila***

Jareth C. Wolfe<sup>1,2,4</sup>, Liudmila A. Mikheeva<sup>1,3,4</sup>, Hani Hagrass<sup>2,\*</sup>, Nicolae Radu Zabet<sup>1,4,\*</sup>

<sup>1</sup> School of Life Sciences, University of Essex, Colchester, CO4 3SQ, UK

<sup>2</sup> School of Computer Science and Electronic Engineering, University of Essex, Colchester, CO4 3SQ, UK

<sup>3</sup> Department of Mathematical Sciences, University of Essex, Colchester, CO4 3SQ, UK

<sup>4</sup> Blizard Institute, Barts and The London School of Medicine and Dentistry, Queen Mary University of London, London, E1 2AT, UK

\* Corresponding authors [r.zabet@qmul.ac.uk](mailto:r.zabet@qmul.ac.uk) and [hani@essex.ac.uk](mailto:hani@essex.ac.uk)

## Supplementary Figures

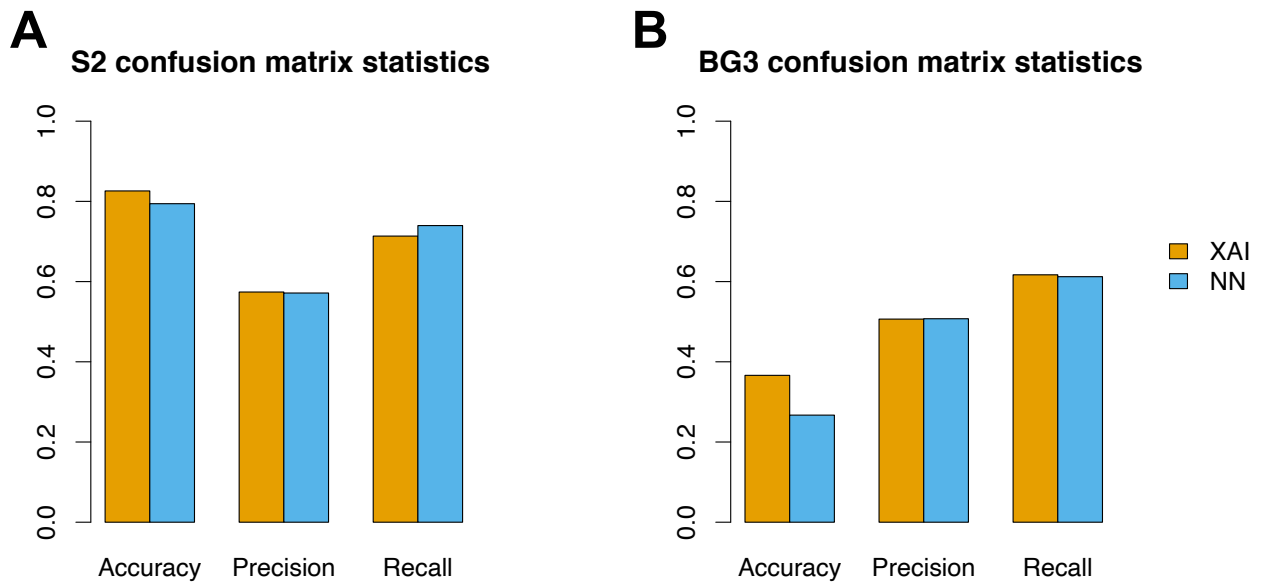

**Fig. S1.** Confusion matrix statistics from individual bin predictions for the S2 trained model. TP - true positives (detected by XAI/ML and STARR-seq), TN - true negatives (not detected by XAI/ML or STARR-seq), FP - false positives (detected only by XAI/ML) and FN - false negatives (detected only by STARR-seq). Accuracy  $((TP + TN)/(TP + TN + FP + FN))$ , Precision  $(TP/(TP + FP))$  and Recall  $(TP/(TP + FN))$  were computed and plotted for the best performing explainable AI and neural network (NN) models. We applied the S2 trained model in (A) S2 cells and (B) BG3 cells.

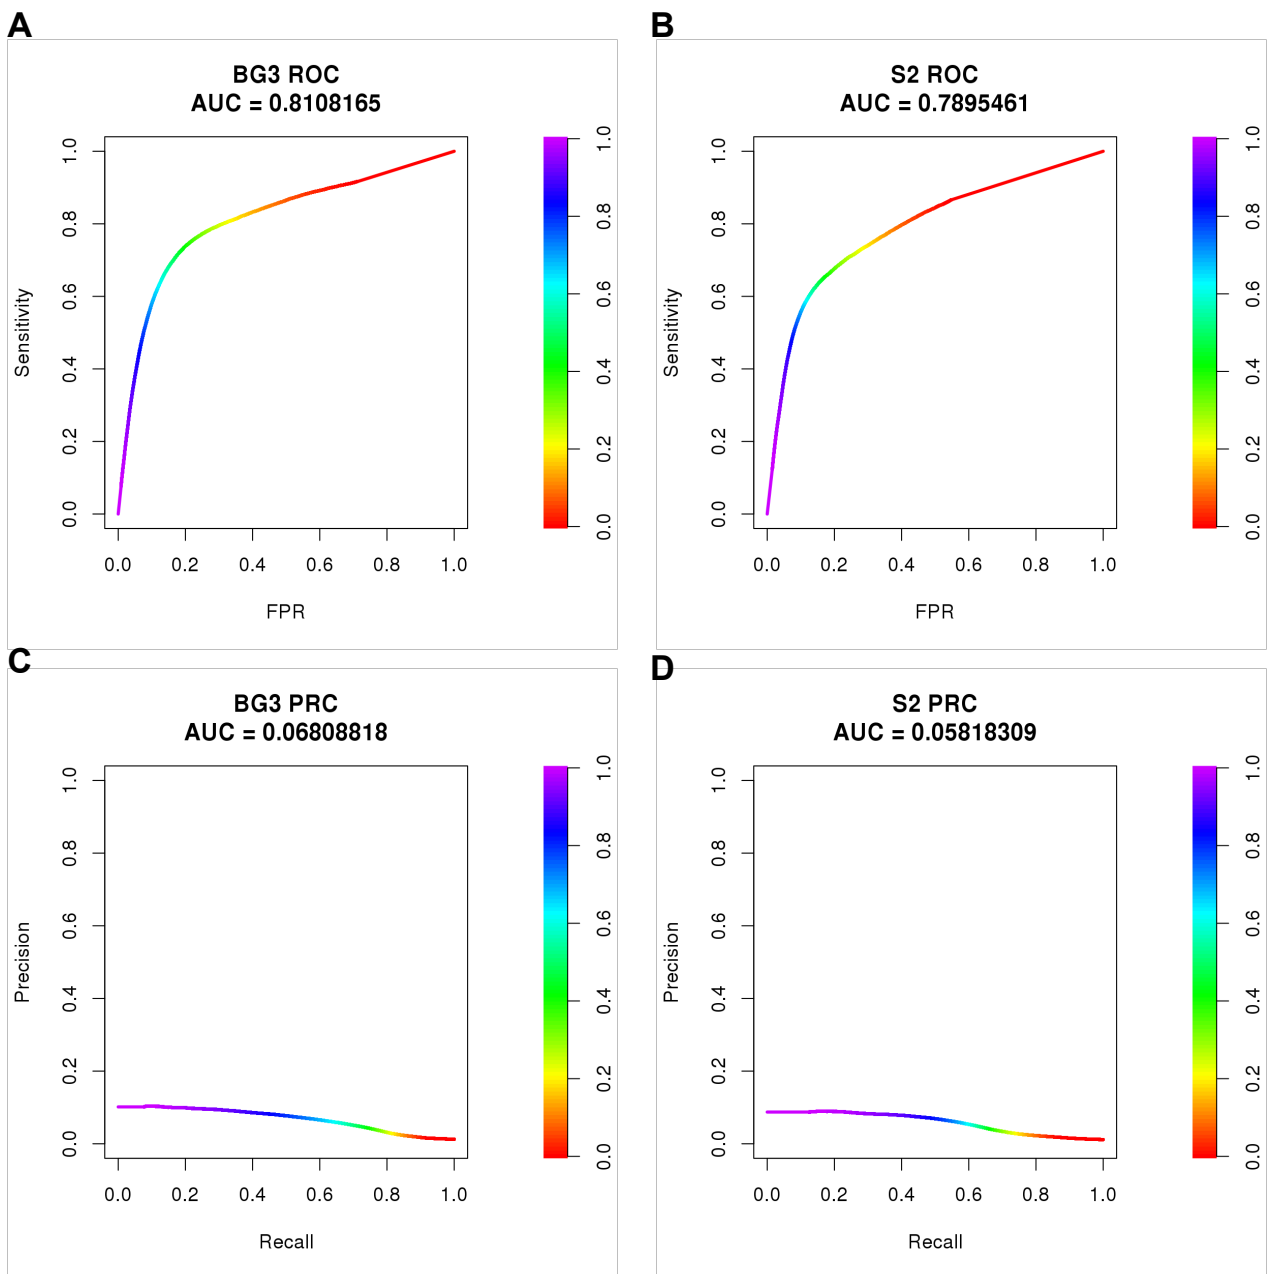

**Fig. S2.** Performance of the XAI model. (A and B) ROC curves for (A) the BG3 trained model and (B) the S2 trained model. (C and D) The PR curves for (C) the BG3 trained model and (D) the S2 trained model. Colour represents the threshold values used to compute the corresponding False Positive Rate ( $FP/(FP+TN)$ ), Sensitivity ( $TP/(TP+FN)$ ), Recall ( $TP/(TP + FN)$ ) and Precision ( $TP/(TP + FP)$ ); where, TP - true positives, TN - true negatives, FP - false positives and FN - false negatives.

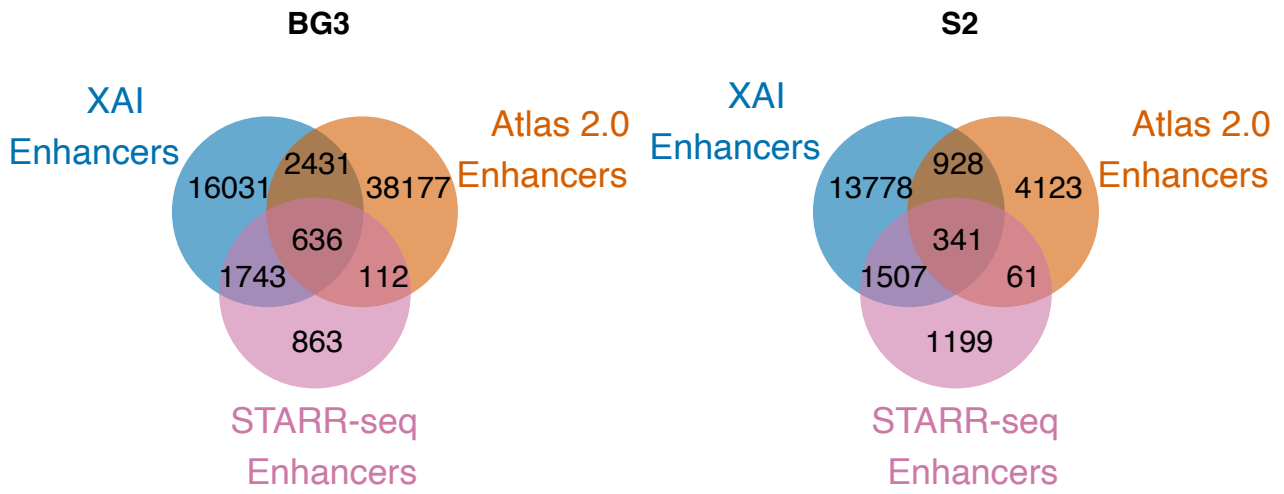

**Fig. S3.** *Overlap of XAI enhancers with STARR-seq and Enhancer Atlas 2.0. We consider the case of BG3 and S2 cells separately.*

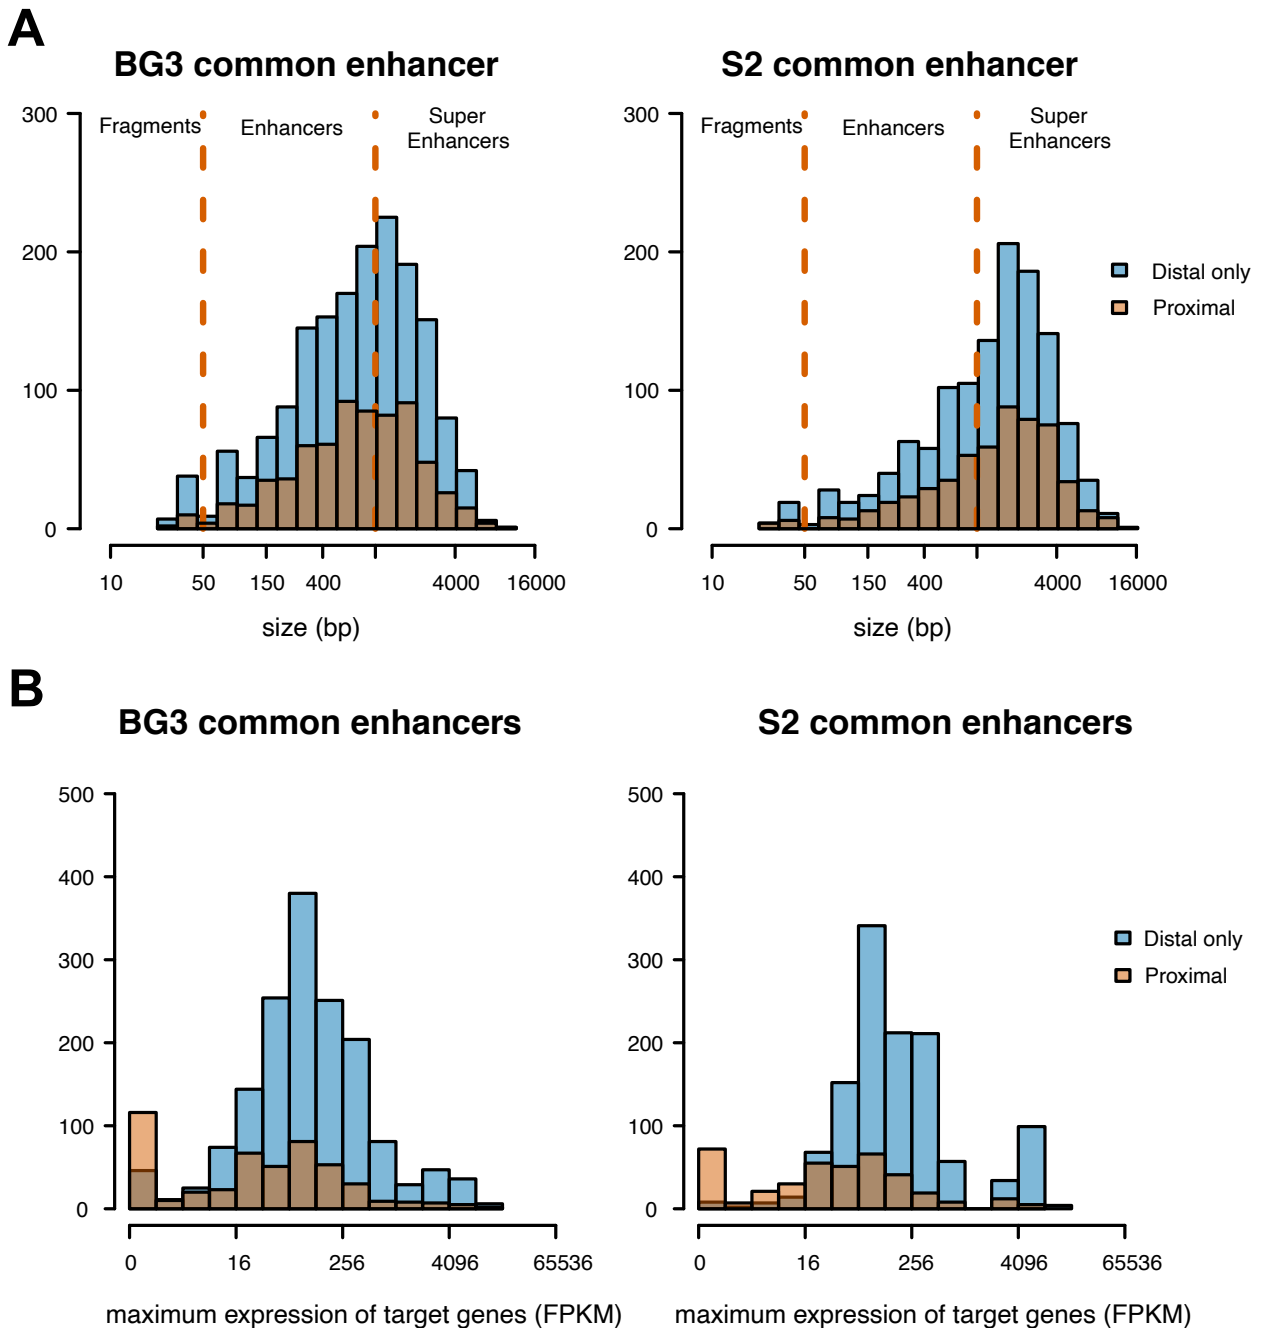

**Fig. S4. Common enhancers make 3D contacts with expressed genes.** (A) The size of distal only and proximal common enhancers in BG3 and S2 cells on  $\log_2$  scale. There is negligible difference between distal only or proximal common enhancers (Mann-Whitney U test of  $\log_2$  of size; p-value = 0.52 for BG3 and p-value = 0.32 for S2). (B) Expression (FPKM) for proximal and distal only common enhancers on  $\log_2$  scale. We considered the maximum expression, where promoters of multiple genes were contacted. There is a higher expression for genes controlled by distal only enhancers compared to proximal ones (Mann-Whitney U test of  $\log_2$  of FPKM; p-value  $< 2.2 \times 10^{-16}$  for BG3 and S2).

### BG3 STARR-seq only enhancers

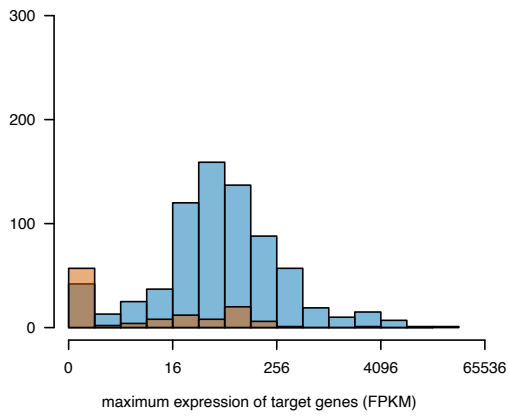

### S2 STARR-seq only enhancers

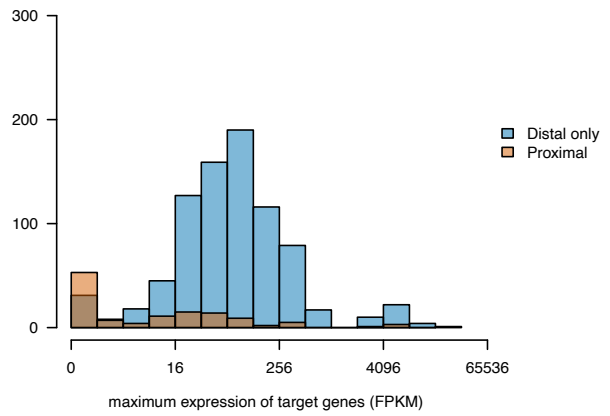

**Fig. S5.** *STARR-seq only enhancers make 3D contacts with expressed genes.* Expression (FPKM) for proximal and distal STARR-seq only enhancers on  $\log_2$  scale. We considered the maximum expression, in the case where promoters of multiple genes were contacted. There is a higher expression for genes controlled by distal only enhancers compared to proximal ones (Mann-Whitney U test of  $\log_2$  of FPKM; p-value  $< 2.2 \times 10^{-16}$  for both BG3 and S2).

### A BG3 enhancer contacts

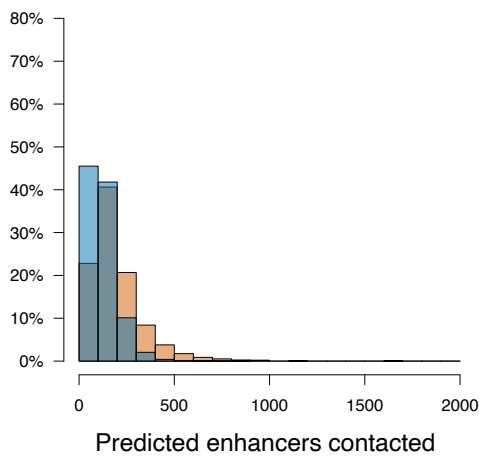

### B S2 enhancer contacts

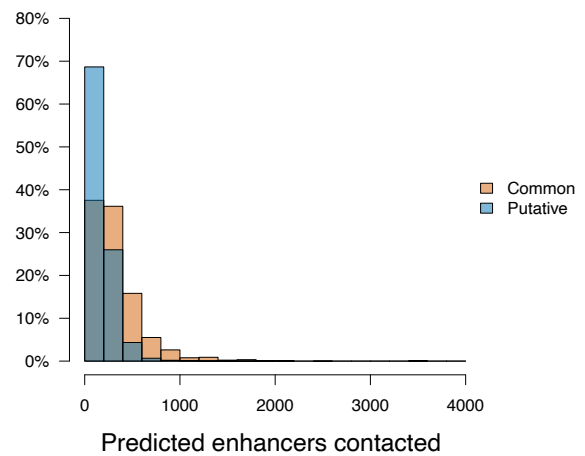

**Fig. S6.** *Co-localisation of enhancers in 3D.* Distributions of the number of Hi-C enriched contacts between enhancers. We considered the case of putative and common enhancers separately. Distributions shown as a percentage density of enhancers within a given bin (Mann-Whitney U test of distributions between common and putative enhancers; p-value  $< 2.2 \times 10^{-16}$  for both BG3 and S2).

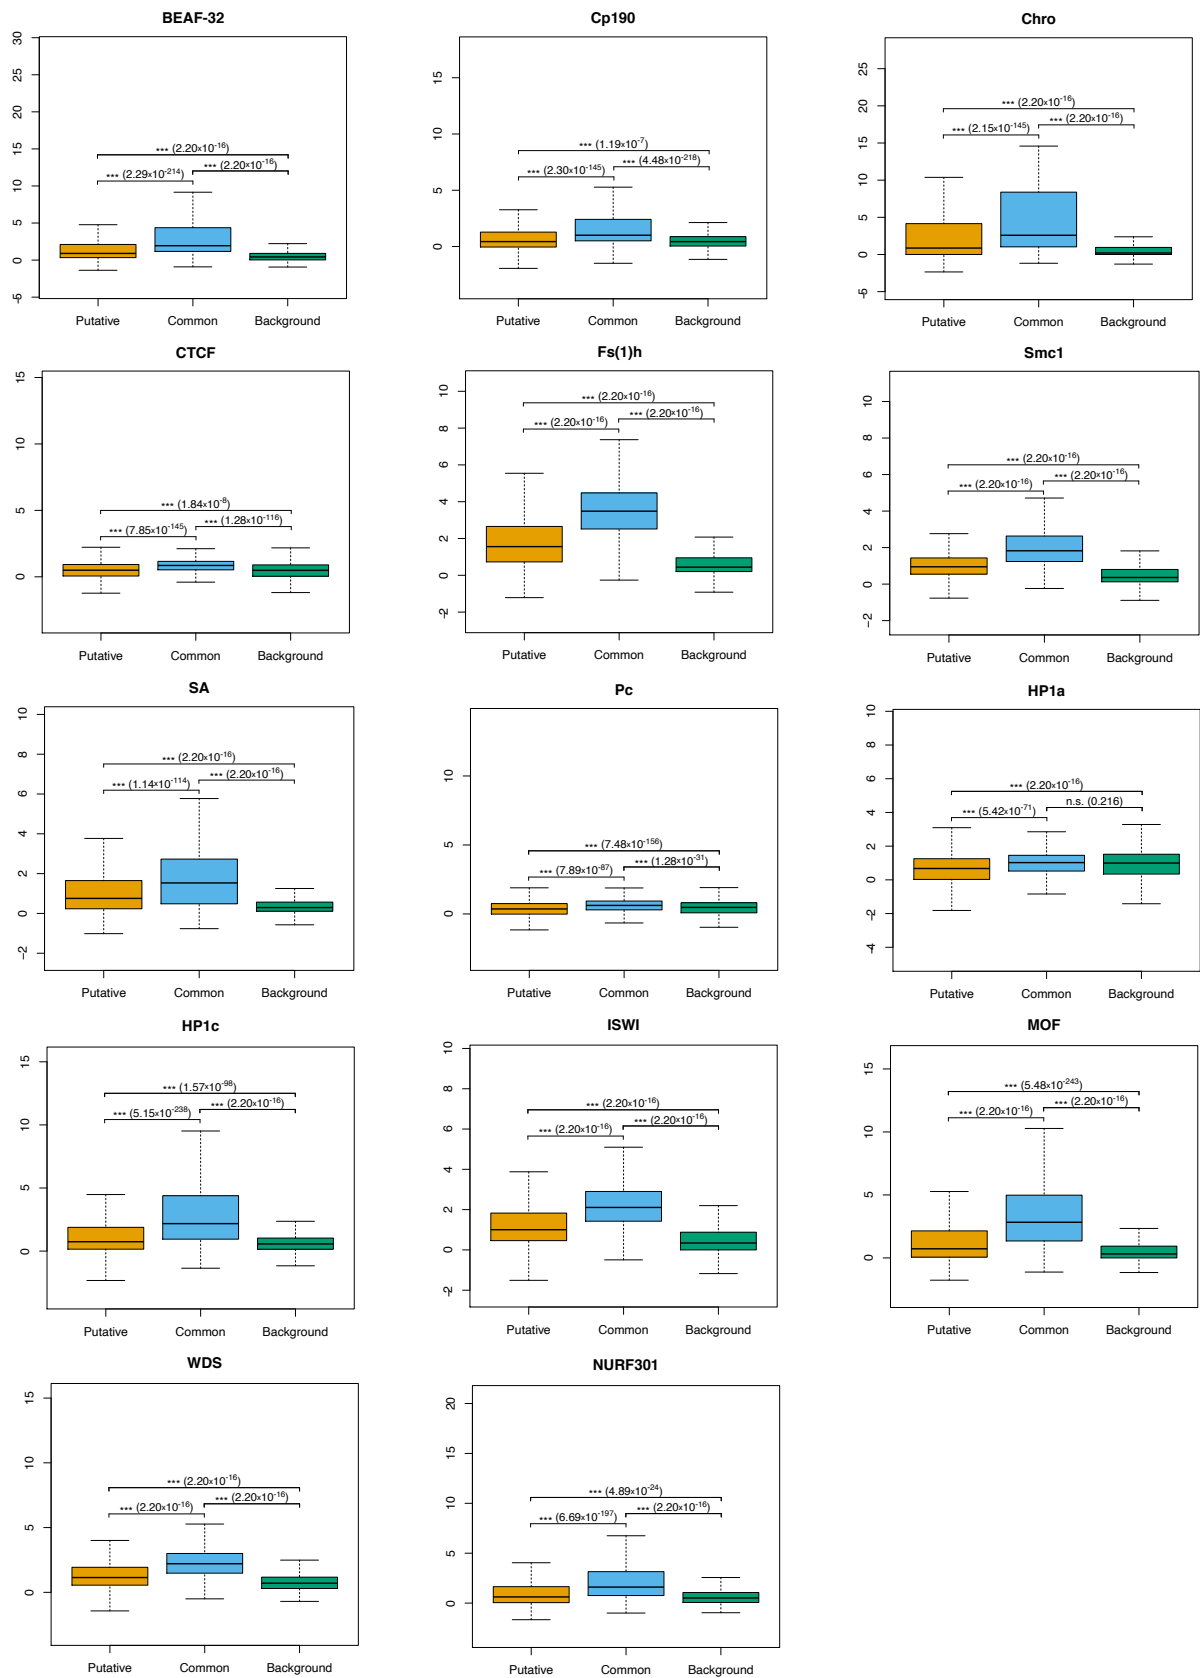

**Fig. S7.** Different chromatin features and architectural proteins are enriched differently across enhancer groups and background. The 95<sup>th</sup> percentile score across the body of each common and putative enhancer was plotted. Mann-Whitney U test scores can be found on each plot for each group comparison.

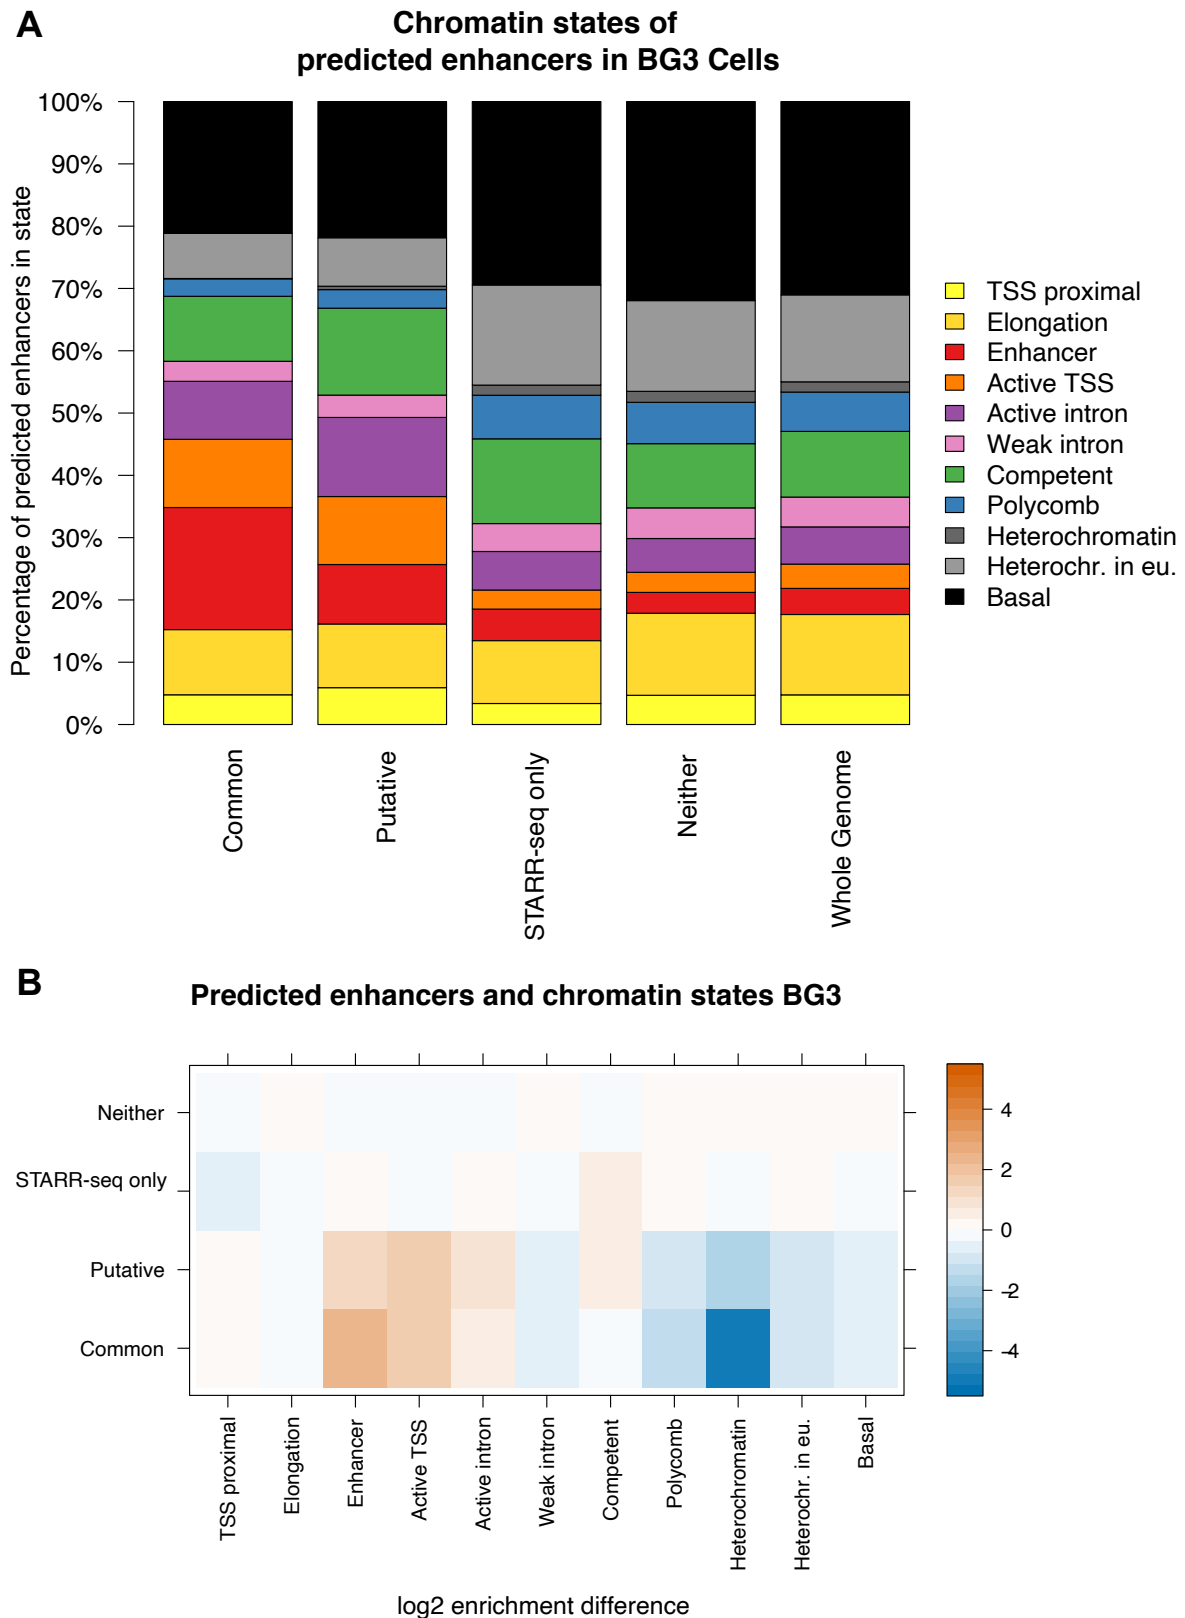

**Fig. S8.** *Overlap of BG3 enhancers with different chromatin states.* We used chromatin state annotation from [37]. (A) We considered different groups of enhancers: (i) enhancers detected by both STARR-seq and XAI (common enhancers), (ii) enhancers detected by XAI only (putative enhancers), (iii) enhancers detected by STARR-seq only and (iv) regions detected by neither. Overlap between the different groups of enhancers and 11 chromatin states. (B)  $\log_2(\text{observed}/\text{expected})$  overlaps based on whole genome distribution of the different chromatin states.



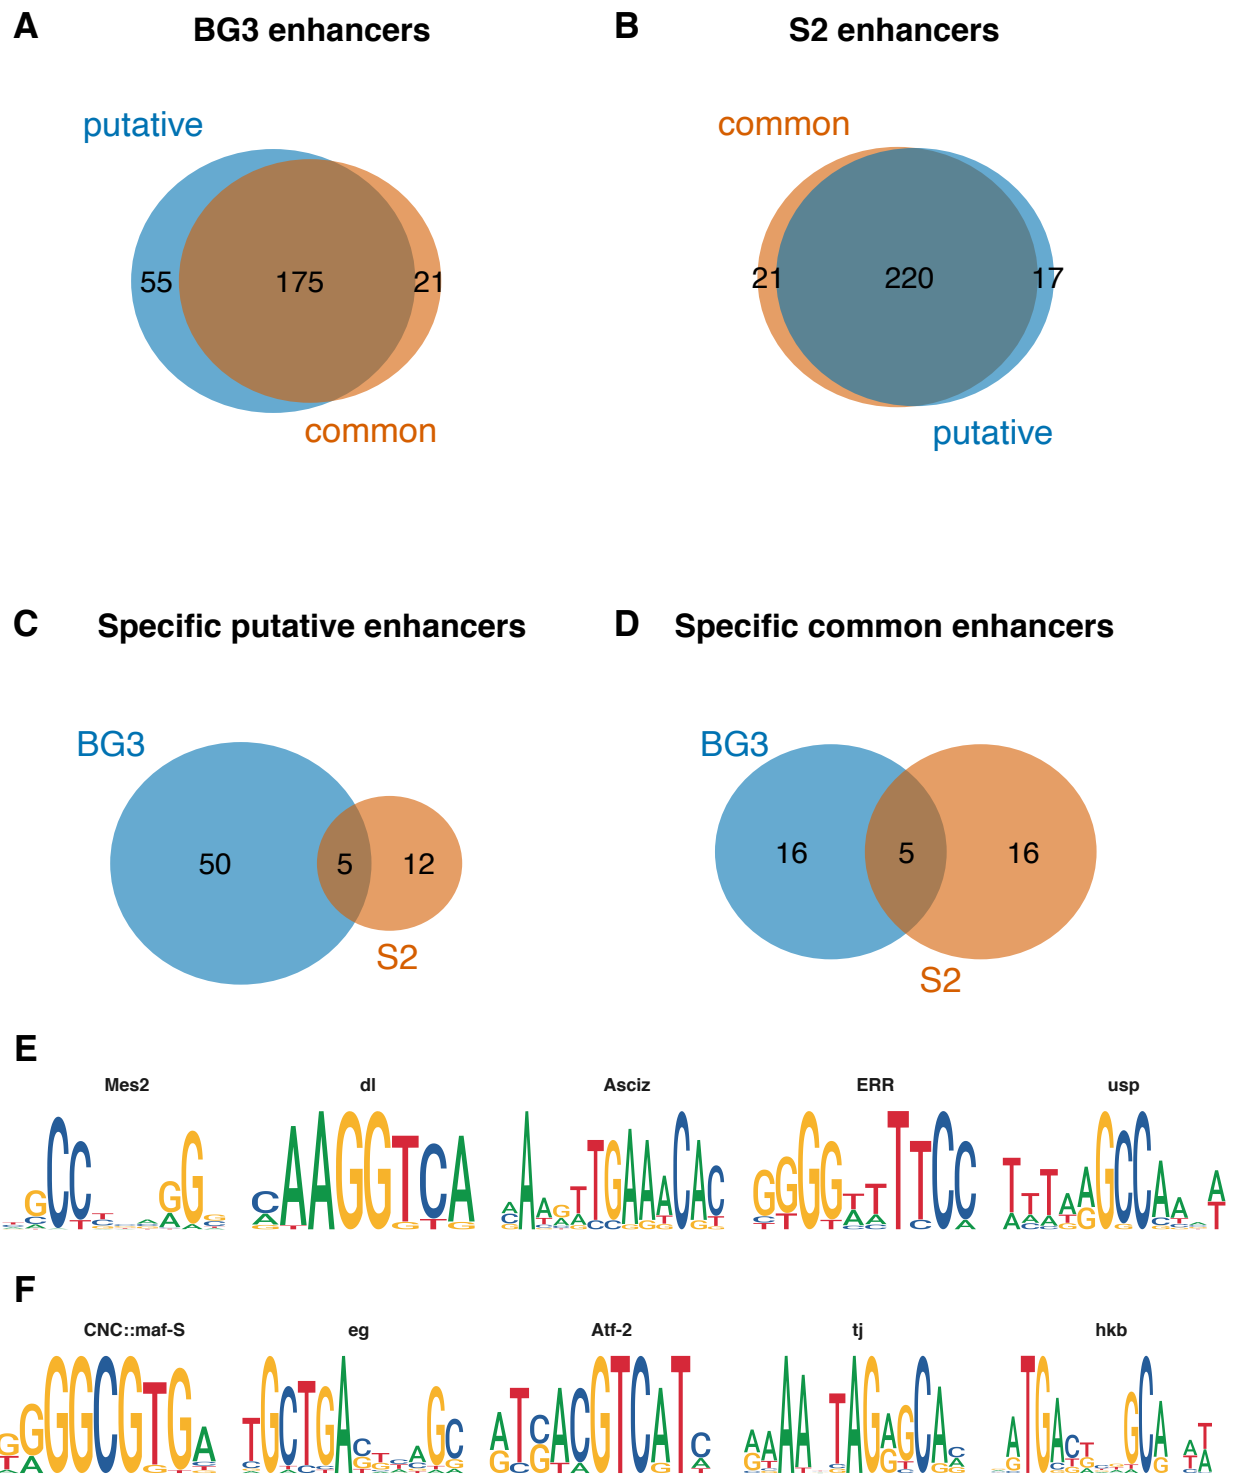

**Fig. S9. TF motif enrichment at common and putative enhancers.** We identified the enriched motifs in the common and putative enhancers (see Materials and Methods). (A-B) The overlap of enriched PWMs at common and putative enhancers in (A) BG3 cells and (B) S2 cells. (C) The overlap between specific motifs for putative enhancers in BG3 and in S2 cells. (D) The overlap between common specific motifs for enhancers in BG3 and in S2 cells. (E) The specific motifs for putative enhancers that are shared between BG3 and S2 cells. (F) The specific motifs for common enhancers that are shared between BG3 and S2 cells.

## Supplementary Tables

**Table S1:** *Enriched motifs at common and putative enhancers in BG3 and S2 cells*

| <b>BG3 putative specific</b> | <b>S2 putative specific</b> | <b>BG3 common specific</b> | <b>S2 common specific</b> |
|------------------------------|-----------------------------|----------------------------|---------------------------|
| ems                          | ct                          | BtbVII                     | HLH54F                    |
| CG11617                      | ERR                         | brk                        | CG13897                   |
| NK7.1                        | dpn                         | Cf2_II                     | toy                       |
| Dfd                          | CG8281                      | amos                       | Kr                        |
| Awh                          | CG14962                     | Sox14                      | E(spl)mdelta-HLH          |
| abd-A                        | Hr4                         | CNC::maf-S                 | l(1)sc                    |
| bap                          | Mes2                        | gt                         | eg                        |
| Antp                         | usp                         | eg                         | E(spl)m3-HLH              |
| Scr                          | CG11504                     | jigr1                      | E(spl)mbeta-HLH           |
| Ubx                          | dimm                        | Atf-2                      | sug                       |
| ind                          | bcd                         | gsb-n                      | CNC::maf-S                |
| exex                         | Hr39                        | tj                         | Atf-2                     |
| otp                          | ftz-f1                      | STAT92E                    | Adf1                      |
| CG4136                       | Rel                         | Rel                        | NFAT                      |
| repo                         | dl_2                        | Mio                        | Su(H)                     |
| E5                           | KR                          | hkb                        | Usf                       |
| CG4404                       | Sox14                       | Optix                      | disco                     |
| CG11294                      |                             | cwo                        | hkb                       |
| Lim3                         |                             | ken                        | tj                        |
| Eip93F                       |                             | CG6276                     | dys                       |
| Hnf4                         |                             | vri                        | shn                       |
| lab                          |                             |                            |                           |
| btn                          |                             |                            |                           |
| CG15601                      |                             |                            |                           |
| PHDP                         |                             |                            |                           |
| C15                          |                             |                            |                           |
| Vsx1                         |                             |                            |                           |
| Mes2                         |                             |                            |                           |
| CG7056                       |                             |                            |                           |
| NFAT                         |                             |                            |                           |
| dl_2                         |                             |                            |                           |
| CG18599                      |                             |                            |                           |
| odd                          |                             |                            |                           |
| Atf6                         |                             |                            |                           |
| CG14962                      |                             |                            |                           |
| sens                         |                             |                            |                           |
| CG10904                      |                             |                            |                           |
| HGTX                         |                             |                            |                           |
| Eip75B                       |                             |                            |                           |
| Fer3                         |                             |                            |                           |
| Six4                         |                             |                            |                           |
| CG3065                       |                             |                            |                           |

|              |  |  |  |
|--------------|--|--|--|
| gl           |  |  |  |
| E(spl)m8-HLH |  |  |  |
| pfk          |  |  |  |
| EcR::usp     |  |  |  |
| Hr83         |  |  |  |
| sens-2       |  |  |  |
| E(spl)       |  |  |  |
| CrebA        |  |  |  |
| disco        |  |  |  |
| CG32105      |  |  |  |
| ERR          |  |  |  |
| CG3919       |  |  |  |
| usp          |  |  |  |

**Table S2: Datasets used in this study**

| <b>BG3 Histone Modifications</b> |                                     |          | <b>dm3 or dm6</b> | <b>LiftOver to dm6</b> |
|----------------------------------|-------------------------------------|----------|-------------------|------------------------|
| H2Bubi                           | 288                                 | GSE20771 | dm3               | yes                    |
| H3K18ac                          | 291                                 | GSE20774 | dm3               | yes                    |
| H3K23ac                          | 293                                 | GSE20776 | dm3               | yes                    |
| H3K27ac                          | 295                                 | GSE20778 | dm3               | yes                    |
| H3K27me3                         | 297                                 | GSE20780 | dm3               | yes                    |
| H3K36me1                         | 299                                 | GSE20782 | dm3               | yes                    |
| H3K36me3                         | 301                                 | GSE20783 | dm3               | yes                    |
| H3K79me2                         | 306                                 | GSE20788 | dm3               | yes                    |
| H3K9me2                          | 310                                 | GSE20791 | dm3               | yes                    |
| H3K9me3                          | 312                                 | GSE20793 | dm3               | yes                    |
| H4K16ac                          | 316                                 | GSE20795 | dm3               | yes                    |
| H3K4me3                          | 967                                 | GSE20839 | dm3               | yes                    |
| H3K4me1                          | 2653                                | GSE23468 | dm3               | yes                    |
| H3K4me2                          | 2654                                | GSE23469 | dm3               | yes                    |
| H3K9acS10P                       | 2659                                | GSE23474 | dm3               | yes                    |
| H3K27me2                         | 2999                                | GSE27789 | dm3               | yes                    |
| H3K79me1                         | 3005                                | GSE32736 | dm3               | yes                    |
| H4K20me1                         | 3286                                | GSE32755 | dm3               | yes                    |
| H1                               | 3299                                | GSE32767 | dm3               | yes                    |
| H3                               | 3302                                | GSE32769 | dm3               | yes                    |
| H3K9ac                           | 3765                                | GSE32832 | dm3               | yes                    |
| H3K9me1                          | 3768                                | GSE32831 | dm3               | yes                    |
| H3K27me1                         | 3941                                | GSE51965 | dm3               | yes                    |
| H3K79me3                         | 4934                                | GSE45062 | dm3               | yes                    |
| H4K8ac                           | 5060                                | GSE45070 | dm3               | yes                    |
| H2Av                             | 6073                                | GSE45110 | dm3               | yes                    |
| <b>BG3 STARR-seq Datasets</b>    |                                     |          |                   |                        |
| STARR-seq peak summits           | Yáñez-Cuna JO, <i>et al.</i> , 2014 | GSE49809 | dm3               | yes                    |
| <b>S2 Histone Modifications</b>  |                                     |          | <b>dm3 or dm6</b> | <b>LiftOver to dm6</b> |
| H2Bubi                           | 290                                 | GSE20773 | dm3               | yes                    |
| H3K18ac                          | 292                                 | GSE20775 | dm3               | yes                    |
| H3K23ac                          | 294                                 | GSE20777 | dm3               | yes                    |
| H3K27ac                          | 296                                 | GSE20779 | dm3               | yes                    |
| H3K27me3                         | 298                                 | GSE20781 | dm3               | yes                    |
| H3K36me3                         | 303                                 | GSE20785 | dm3               | yes                    |
| H3K4me1                          | 304                                 | GSE20786 | dm3               | yes                    |
| H3K79me2                         | 307                                 | GSE20789 | dm3               | yes                    |
| H3K9ac                           | 309                                 | GSE20790 | dm3               | yes                    |
| H3K9me3                          | 313                                 | GSE20794 | dm3               | yes                    |
| H4K16ac                          | 319                                 | GSE20798 | dm3               | yes                    |
| H4K8ac                           | 322                                 | GSE20801 | dm3               | yes                    |

|                                                    |                                     |           |                   |                        |
|----------------------------------------------------|-------------------------------------|-----------|-------------------|------------------------|
| H3K4me2                                            | 2655                                | GSE23470  | dm3               | yes                    |
| H3K79me1                                           | 2658                                | GSE23473  | dm3               | yes                    |
| H3K9acS10P                                         | 2660                                | GSE23475  | dm3               | yes                    |
| H2Av                                               | 2991                                | GSE27731  | dm3               | yes                    |
| H3K27me2                                           | 3000                                | GSE27790  | dm3               | yes                    |
| H3K9me2                                            | 3011                                | GSE27741  | dm3               | yes                    |
| H4K20me1                                           | 3014                                | GSE27743  | dm3               | yes                    |
| H3K36me1                                           | 3170                                | GSE25374  | dm3               | yes                    |
| H1                                                 | 3300                                | GSE32768  | dm3               | yes                    |
| H3                                                 | 3301                                | GSE44465  | dm3               | yes                    |
| H3K4me3                                            | 3761                                | GSE32827  | dm3               | yes                    |
| H3K9me1                                            | 3770                                | GSE32833  | dm3               | yes                    |
| H3K27me1                                           | 3943                                | GSE44507  | dm3               | yes                    |
| H3K79me3                                           | 5143                                | GSE45090  | dm3               | yes                    |
| <b>S2 STARR-seq Datasets</b>                       |                                     |           |                   |                        |
| STARR-seq peak summits                             | Yáñez-Cuna JO, <i>et al.</i> , 2014 | GSE49809  | dm3               | yes                    |
| <b>S2 Developmental And Housekeeping Enhancers</b> |                                     |           |                   |                        |
| STARR-seq peak summits                             | Zabidi, <i>et al.</i> , 2014        | GSE57876  | dm3               | yes                    |
| <b>Architectural proteins</b>                      |                                     |           | <b>dm3 or dm6</b> | <b>LiftOver to dm6</b> |
| BEAF-32                                            | 3665                                | GSE32775  | dm3               | yes                    |
| Cp190                                              | 3666                                | GSE32776  | dm3               | yes                    |
| Criz/Chro                                          | 275                                 | GSE20761  | dm3               | yes                    |
| CTCF                                               | 3673                                | GSE32783  | dm3               | yes                    |
| NippedB                                            | Pherson et al (2019)                | GSE118484 | dm3               | yes                    |
| <b>Transcription and replication</b>               |                                     |           |                   |                        |
| Pol-II                                             | 950                                 | GSE20832  | dm3               | yes                    |
| 3'NT-seq                                           | Pherson et al (2017)                | GSE100545 | dm3               | yes                    |
| <b>DNA accessibility</b>                           |                                     |           |                   |                        |
| H3                                                 | 3302                                | GSE32769  | dm3               | yes                    |
| H4                                                 | 3303                                | GSE32770  | dm3               | yes                    |
| <b>Histone modifications (for Figure 6)</b>        |                                     |           |                   |                        |
| H3K4me3                                            | 967                                 | GSE20839  | dm3               | yes                    |
| H3K4me1                                            | 2653                                | GSE23468  | dm3               | yes                    |
| H3K27ac                                            | 295                                 | GSE20778  | dm3               | yes                    |
| H3K36me3                                           | 301                                 | GSE20783  | dm3               | yes                    |
| H3K79me1                                           | 3005                                | GSE32736  | dm3               | yes                    |
| H4K16ac                                            | 316                                 | GSE20795  | dm3               | yes                    |
| <b>Nucleosome remodelling factors</b>              |                                     |           |                   |                        |
| ISWI                                               | 3030                                | GSE27750  | dm3               | yes                    |
| MOF                                                | 3041                                | GSE27803  | dm3               | yes                    |
| WDS                                                | 5148                                | GSE45094  | dm3               | yes                    |
| NURF301                                            | 5063                                | GSE45072  | dm3               | yes                    |

| <b>Polycomb and heterochromatin</b> |      |          |     |     |
|-------------------------------------|------|----------|-----|-----|
| Pc                                  | 325  | GSE20803 | dm3 | yes |
| HP1a                                | 4126 | GSE44515 | dm3 | yes |
| HP1c                                | 942  | GSE20824 | dm3 | yes |
